# Supplementary material
Source: MDPI journal article supplement (https://www.mdpi.com/2078-2489/12/8/326)
Supplement: s1 [file s1]

Table S.1 Probabilities of diabetic complications in each cycle after computation

| cycle | ASHD        | CHF         | ISC         | FESRD       | EYE         | FIN_FOOT    | ASHD+CHF    | ASHD+ISC    | CHF+ISC     | ASHD+CHF+ISC | ESRD        | CHF+FIN_FOOT | DEAD        |
|-------|-------------|-------------|-------------|-------------|-------------|-------------|-------------|-------------|-------------|--------------|-------------|--------------|-------------|
| 1     | 0.193545021 | 0.048120185 | 0.018286027 | 0.020799231 | 0.196989852 | 0.007044146 | 0.037192803 | 0.003118889 | 0.000849592 | 1.0859E-14   | 2.55345E-07 | 0.010990518  | 0.463063481 |
| 2     | 0.2051259   | 0.047463017 | 0.025288236 | 0.035009831 | 0.127791537 | 0.008943813 | 0.043267541 | 0.003223843 | 0.001137915 | 4.6533E-13   | 5.50258E-08 | 0.001419131  | 0.501329181 |
| 3     | 0.203572953 | 0.045659211 | 0.02840998  | 0.043382033 | 0.104101952 | 0.009643956 | 0.044796834 | 0.003163658 | 0.001259758 | 4.03486E-12  | 3.33018E-08 | 0.000797255  | 0.515212377 |
| 4     | 0.201111198 | 0.044202448 | 0.030453925 | 0.049620397 | 0.090439574 | 0.01006145  | 0.04550559  | 0.003102282 | 0.001337715 | 1.78227E-11  | 2.36965E-08 | 0.000543868  | 0.523621529 |
| 5     | 0.19859846  | 0.042997938 | 0.03196395  | 0.054671051 | 0.081165728 | 0.010348568 | 0.045882    | 0.003046586 | 0.001394301 | 5.49203E-11  | 1.82912E-08 | 0.000407594  | 0.529523807 |
| 6     | 0.196206915 | 0.041974013 | 0.033154135 | 0.058949319 | 0.074304861 | 0.010561584 | 0.046089044 | 0.002996618 | 0.001438256 | 1.35606E-10  | 1.48331E-08 | 0.000323117  | 0.534002123 |
| 7     | 0.193970112 | 0.041084398 | 0.034131411 | 0.062679147 | 0.068947678 | 0.010727344 | 0.046198416 | 0.002951579 | 0.001473905 | 2.88358E-10  | 1.24335E-08 | 0.00026593   | 0.537570069 |
| 8     | 0.191885327 | 0.040298308 | 0.034956951 | 0.065996582 | 0.064606054 | 0.010860648 | 0.046246902 | 0.002910673 | 0.001503695 | 5.50739E-10  | 1.06724E-08 | 0.000224816  | 0.540510033 |
| 9     | 0.189940071 | 0.039594385 | 0.035669026 | 0.068991104 | 0.06099017  | 0.010970464 | 0.04625537  | 0.002873239 | 0.001529145 | 9.702E-10    | 9.32593E-09 | 0.000193933  | 0.542993082 |
| 10    | 0.188120075 | 0.03895725  | 0.036293164 | 0.071725014 | 0.057915134 | 0.011062612 | 0.046236531 | 0.002838749 | 0.001551261 | 1.60481E-09  | 8.26375E-09 | 0.000169947  | 0.545130254 |
| 11    | 0.186411816 | 0.038375469 | 0.036847231 | 0.0742436   | 0.055256463 | 0.011141062 | 0.046198552 | 0.002806779 | 0.001570739 | 2.52392E-09  | 7.405E-09   | 0.000150821  | 0.546997459 |
| 12    | 0.184803227 | 0.037840315 | 0.037344215 | 0.076580916 | 0.052926734 | 0.011208636 | 0.046146895 | 0.002776987 | 0.001588085 | 3.80883E-09  | 6.69675E-09 | 0.000135243  | 0.548648736 |
| 13    | 0.183283782 | 0.037344978 | 0.037793848 | 0.078763271 | 0.05086244  | 0.011267402 | 0.046085341 | 0.002749097 | 0.001603673 | 5.55334E-09  | 6.10296E-09 | 0.000122329  | 0.550123828 |
| 14    | 0.181844373 | 0.036884039 | 0.038203605 | 0.080811451 | 0.049016141 | 0.01131892  | 0.046016571 | 0.002722879 | 0.00161779  | 7.86434E-09  | 5.59821E-09 | 0.000111464  | 0.551452753 |
| 15    | 0.180477124 | 0.036453117 | 0.038579349 | 0.082742192 | 0.047351567 | 0.011364387 | 0.045942532 | 0.002698146 | 0.001630659 | 1.08624E-08  | 5.16407E-09 | 0.000102209  | 0.552658702 |
| 16    | 0.179175217 | 0.036048619 | 0.038925762 | 0.084569181 | 0.045840432 | 0.011404746 | 0.045864661 | 0.002674737 | 0.001642459 | 1.4682E-08   | 4.78686E-09 | 9.42371E-05  | 0.55375993  |
| 17    | 0.177932724 | 0.03566756  | 0.039246642 | 0.08630377  | 0.044460296 | 0.011440746 | 0.045784035 | 0.002652518 | 0.001653332 | 1.94726E-08  | 4.4562E-09  | 8.73066E-05  | 0.554771048 |
| 18    | 0.176744473 | 0.035307435 | 0.039545106 | 0.087955487 | 0.043193091 | 0.011472993 | 0.045701472 | 0.002631373 | 0.001663395 | 2.53984E-08  | 4.16409E-09 | 8.12308E-05  | 0.555703915 |
| 19    | 0.175605926 | 0.03496612  | 0.039823748 | 0.089532412 | 0.042024081 | 0.011501983 | 0.045617599 | 0.002611203 | 0.001672747 | 3.26395E-08  | 3.90425E-09 | 7.58648E-05  | 0.55656828  |
| 20    | 0.174513087 | 0.034641799 | 0.040084745 | 0.091041463 | 0.040941104 | 0.011528128 | 0.045532902 | 0.002591923 | 0.001681467 | 4.13916E-08  | 3.67169E-09 | 7.10945E-05  | 0.557372244 |
| 21    | 0.17346242  | 0.034332905 | 0.040329945 | 0.092488609 | 0.039934021 | 0.01155177  | 0.045447756 | 0.002573456 | 0.001689625 | 5.18672E-08  | 3.46239E-09 | 6.68287E-05  | 0.558122608 |
| 22    | 0.172450782 | 0.034038081 | 0.040560926 | 0.093879043 | 0.038994303 | 0.011573199 | 0.045362459 | 0.002555738 | 0.001697278 | 6.42952E-08  | 3.2731E-09  | 6.29935E-05  | 0.55882513  |
| 23    | 0.17147537  | 0.033756138 | 0.040779046 | 0.095217311 | 0.03811471  | 0.01159266  | 0.045277242 | 0.00253871  | 0.001704478 | 7.89222E-08  | 3.10111E-09 | 5.95288E-05  | 0.559484725 |
| 24    | 0.17053367  | 0.033486034 | 0.040985484 | 0.096507418 | 0.037289055 | 0.011610363 | 0.045192288 | 0.00252232  | 0.001711266 | 9.60121E-08  | 2.94421E-09 | 5.63849E-05  | 0.560105619 |
| 25    | 0.169623422 | 0.033226846 | 0.04118127  | 0.097752908 | 0.03651201  | 0.011626489 | 0.04510774  | 0.002506522 | 0.001717682 | 1.15847E-07  | 2.80053E-09 | 5.35206E-05  | 0.560691471 |
| 26    | 0.168742589 | 0.032977756 | 0.041367304 | 0.098956941 | 0.035778963 | 0.011641196 | 0.045023712 | 0.002491276 | 0.001723757 | 1.38727E-07  | 2.6685E-09  | 5.09012E-05  | 0.561245464 |
| 27    | 0.167889322 | 0.032738035 | 0.041544382 | 0.100122339 | 0.035085892 | 0.01165462  | 0.044940293 | 0.002476543 | 0.00172952  | 1.64971E-07  | 2.54679E-09 | 4.84977E-05  | 0.561770387 |
| 28    | 0.167061946 | 0.032507028 | 0.041713211 | 0.10125164  | 0.034429276 | 0.01166688  | 0.044857551 | 0.002462292 | 0.001734998 | 1.94918E-07  | 2.43425E-09 | 4.62852E-05  | 0.562268695 |
| 29    | 0.166258933 | 0.032284147 | 0.041874417 | 0.10234713  | 0.033806016 | 0.011678083 | 0.04477554  | 0.002448491 | 0.001740213 | 2.28925E-07  | 2.32992E-09 | 4.42425E-05  | 0.562742557 |
| 30    | 0.165478886 | 0.032068862 | 0.042028561 | 0.103410882 | 0.033213369 | 0.01168832  | 0.0446943   | 0.002435113 | 0.001745185 | 2.67369E-07  | 2.23294E-09 | 4.23515E-05  | 0.5631939   |
| 31    | 0.164720528 | 0.031860692 | 0.042176148 | 0.104444776 | 0.032648902 | 0.011697674 | 0.044613863 | 0.002422134 | 0.001749932 | 3.10648E-07  | 2.14259E-09 | 4.05965E-05  | 0.563624442 |
| 32    | 0.163982684 | 0.031659201 | 0.04231763  | 0.105450526 | 0.032110444 | 0.011706219 | 0.044534249 | 0.002409529 | 0.00175447  | 3.5918E-07   | 2.05822E-09 | 3.89637E-05  | 0.564035723 |
| 33    | 0.163264273 | 0.03146399  | 0.042453417 | 0.106429697 | 0.031596053 | 0.01171402  | 0.044455475 | 0.002397279 | 0.001758815 | 4.13404E-07  | 1.97927E-09 | 3.74412E-05  | 0.564429124 |

|    |             |             |             |             |             |             |             |             |             |             |             |             |             |
|----|-------------|-------------|-------------|-------------|-------------|-------------|-------------|-------------|-------------|-------------|-------------|-------------|-------------|
| 34 | 0.1625643   | 0.031274697 | 0.042583879 | 0.107383727 | 0.031103983 | 0.011721136 | 0.04437755  | 0.002385365 | 0.001762979 | 4.73779E-07 | 1.90526E-09 | 3.60186E-05 | 0.564805889 |
| 35 | 0.161881842 | 0.031090988 | 0.042709356 | 0.108313935 | 0.030632665 | 0.011727621 | 0.044300478 | 0.002373767 | 0.001766974 | 5.40786E-07 | 1.83574E-09 | 3.46868E-05 | 0.565167146 |
| 36 | 0.161216045 | 0.030912558 | 0.042830153 | 0.109221535 | 0.030180676 | 0.011733521 | 0.044224261 | 0.002362471 | 0.001770811 | 6.14929E-07 | 1.77033E-09 | 3.34375E-05 | 0.565513916 |
| 37 | 0.160566116 | 0.030739125 | 0.042946552 | 0.110107649 | 0.029746729 | 0.01173888  | 0.044148898 | 0.002351461 | 0.0017745   | 6.96731E-07 | 1.70868E-09 | 3.22637E-05 | 0.565847126 |
| 38 | 0.15993132  | 0.030570429 | 0.04305881  | 0.110973318 | 0.029329655 | 0.011743737 | 0.044074385 | 0.002340723 | 0.00177805  | 7.86741E-07 | 1.6505E-09  | 3.11589E-05 | 0.566167625 |
| 39 | 0.15931097  | 0.030406231 | 0.043167164 | 0.111819502 | 0.028928388 | 0.011748128 | 0.044000715 | 0.002330244 | 0.00178147  | 8.85527E-07 | 1.5955E-09  | 3.01175E-05 | 0.566476184 |
| 40 | 0.158704425 | 0.030246307 | 0.043271831 | 0.112647098 | 0.028541953 | 0.011752085 | 0.04392788  | 0.002320012 | 0.001784767 | 9.93682E-07 | 1.54344E-09 | 2.91343E-05 | 0.566773513 |
| 41 | 0.158111086 | 0.030090451 | 0.043373012 | 0.113456939 | 0.028169459 | 0.011755637 | 0.043855873 | 0.002310016 | 0.001787948 | 1.11182E-06 | 1.49409E-09 | 2.82048E-05 | 0.567060262 |
| 42 | 0.157530394 | 0.029938472 | 0.043470892 | 0.1142498   | 0.027810088 | 0.011758811 | 0.043784682 | 0.002300246 | 0.001791019 | 1.24059E-06 | 1.44726E-09 | 2.73248E-05 | 0.567337031 |
| 43 | 0.156961823 | 0.02979019  | 0.043565642 | 0.115026408 | 0.027463087 | 0.011761633 | 0.043714296 | 0.002290691 | 0.001793987 | 1.38064E-06 | 1.40277E-09 | 2.64906E-05 | 0.567604371 |
| 44 | 0.15640488  | 0.029645439 | 0.043657422 | 0.115787442 | 0.027127764 | 0.011764125 | 0.043644706 | 0.002281342 | 0.001796857 | 1.53266E-06 | 1.36044E-09 | 2.5699E-05  | 0.567862792 |
| 45 | 0.155859102 | 0.029504062 | 0.04374638  | 0.116533537 | 0.026803478 | 0.011766307 | 0.043575897 | 0.002272191 | 0.001799634 | 1.69737E-06 | 1.32014E-09 | 2.49468E-05 | 0.568112765 |
| 46 | 0.155324054 | 0.029365915 | 0.043832652 | 0.117265291 | 0.026489639 | 0.0117682   | 0.043507859 | 0.002263229 | 0.001802324 | 1.8755E-06  | 1.28172E-09 | 2.42313E-05 | 0.568354729 |
| 47 | 0.154799323 | 0.029230859 | 0.043916368 | 0.117983266 | 0.026185698 | 0.011769821 | 0.043440579 | 0.00225445  | 0.001804929 | 2.06781E-06 | 1.24507E-09 | 2.35499E-05 | 0.568589088 |
| 48 | 0.154284523 | 0.029098767 | 0.043997646 | 0.118687988 | 0.025891147 | 0.011771187 | 0.043374044 | 0.002245846 | 0.001807455 | 2.27508E-06 | 1.21006E-09 | 2.29004E-05 | 0.56881622  |
| 49 | 0.153779288 | 0.028969519 | 0.044076599 | 0.119379956 | 0.025605512 | 0.011772312 | 0.043308241 | 0.00223741  | 0.001809906 | 2.49813E-06 | 1.17659E-09 | 2.22807E-05 | 0.569036478 |
| 50 | 0.153283271 | 0.028843    | 0.044153331 | 0.120059638 | 0.025328355 | 0.011773211 | 0.043243157 | 0.002229136 | 0.001812284 | 2.73779E-06 | 1.14457E-09 | 2.16888E-05 | 0.569250188 |
| 51 | 0.152796146 | 0.028719105 | 0.04422794  | 0.120727479 | 0.025059265 | 0.011773898 | 0.04317878  | 0.002221017 | 0.001814594 | 2.99493E-06 | 1.11391E-09 | 2.1123E-05  | 0.569457658 |
| 52 | 0.152317601 | 0.028597732 | 0.044300518 | 0.121383896 | 0.024797859 | 0.011774383 | 0.043115098 | 0.002213049 | 0.001816838 | 3.27042E-06 | 1.08453E-09 | 2.05817E-05 | 0.569659173 |
| 53 | 0.151847342 | 0.028478786 | 0.044371152 | 0.122029287 | 0.02454378  | 0.011774679 | 0.043052097 | 0.002205226 | 0.00181902  | 3.5652E-06  | 1.05634E-09 | 2.00634E-05 | 0.569855002 |
| 54 | 0.15138509  | 0.028362177 | 0.044439923 | 0.122664028 | 0.024296692 | 0.011774796 | 0.042989765 | 0.002197543 | 0.001821141 | 3.88019E-06 | 1.0293E-09  | 1.95667E-05 | 0.570045396 |
| 55 | 0.15093058  | 0.02824782  | 0.044506908 | 0.123288476 | 0.024056283 | 0.011774744 | 0.042928089 | 0.002189994 | 0.001823206 | 4.21636E-06 | 1.00332E-09 | 1.90903E-05 | 0.570230592 |
| 56 | 0.150483559 | 0.028135635 | 0.044572178 | 0.123902968 | 0.023822258 | 0.011774532 | 0.042867059 | 0.002182576 | 0.001825215 | 4.57471E-06 | 9.78351E-10 | 1.86331E-05 | 0.570410812 |
| 57 | 0.150043786 | 0.028025546 | 0.044635801 | 0.124507826 | 0.023594339 | 0.01177417  | 0.042806661 | 0.002175284 | 0.001827172 | 4.95627E-06 | 9.54338E-10 | 1.81939E-05 | 0.570586263 |
| 58 | 0.149611034 | 0.027917479 | 0.044697843 | 0.125103357 | 0.023372268 | 0.011773663 | 0.042746885 | 0.002168114 | 0.001829079 | 5.36207E-06 | 9.31228E-10 | 1.77719E-05 | 0.570757143 |
| 59 | 0.149185083 | 0.027811366 | 0.044758363 | 0.125689852 | 0.0231558   | 0.011773022 | 0.042687718 | 0.002161061 | 0.001830938 | 5.7932E-06  | 9.08975E-10 | 1.7366E-05  | 0.570923637 |
| 60 | 0.148765726 | 0.027707142 | 0.04481742  | 0.126267587 | 0.022944703 | 0.011772252 | 0.04262915  | 0.002154123 | 0.00183275  | 6.25076E-06 | 8.87533E-10 | 1.69753E-05 | 0.57108592  |
| 61 | 0.148359735 | 0.027604275 | 0.044873911 | 0.126831551 | 0.02273861  | 0.011771367 | 0.042570776 | 0.002147514 | 0.001834227 | 6.73365E-06 | 8.7115E-10  | 1.66256E-05 | 0.571244675 |
| 62 | 0.147959935 | 0.027503182 | 0.044929049 | 0.127387249 | 0.022537473 | 0.011770369 | 0.042512988 | 0.00214101  | 0.00183566  | 7.24494E-06 | 8.55322E-10 | 1.62885E-05 | 0.571399551 |
| 63 | 0.147566145 | 0.027403807 | 0.044982884 | 0.127934924 | 0.022341096 | 0.011769262 | 0.042455773 | 0.00213461  | 0.001837053 | 7.78577E-06 | 8.40022E-10 | 1.59633E-05 | 0.571550695 |
| 64 | 0.14717819  | 0.027306098 | 0.045035461 | 0.128474808 | 0.022149297 | 0.011768054 | 0.042399121 | 0.002128309 | 0.001838406 | 8.35734E-06 | 8.25224E-10 | 1.56495E-05 | 0.571698249 |
| 65 | 0.146795905 | 0.027210001 | 0.045086826 | 0.129007121 | 0.0219619   | 0.011766748 | 0.042343022 | 0.002122106 | 0.001839721 | 8.96085E-06 | 8.10905E-10 | 1.53464E-05 | 0.571842343 |
| 66 | 0.146419131 | 0.027115468 | 0.04513702  | 0.129532075 | 0.021778741 | 0.01176535  | 0.042287466 | 0.002115996 | 0.001840999 | 9.59756E-06 | 7.97041E-10 | 1.50536E-05 | 0.571983103 |
| 67 | 0.146047714 | 0.027022451 | 0.045186082 | 0.130049872 | 0.021599664 | 0.011763865 | 0.042232443 | 0.002109978 | 0.001842241 | 1.02687E-05 | 7.83613E-10 | 1.47706E-05 | 0.57212065  |

|    |             |             |             |             |             |             |             |             |             |             |             |             |             |
|----|-------------|-------------|-------------|-------------|-------------|-------------|-------------|-------------|-------------|-------------|-------------|-------------|-------------|
| 68 | 0.145681509 | 0.026930906 | 0.045234052 | 0.130560708 | 0.02142452  | 0.011762296 | 0.042177942 | 0.002104049 | 0.001843449 | 1.09757E-05 | 7.70599E-10 | 1.44969E-05 | 0.572255095 |
| 69 | 0.145320375 | 0.02684079  | 0.045280966 | 0.131064768 | 0.021253169 | 0.011760647 | 0.042123955 | 0.002098206 | 0.001844624 | 1.17197E-05 | 7.57983E-10 | 1.42321E-05 | 0.572386547 |
| 70 | 0.144964178 | 0.026752061 | 0.045326857 | 0.131562231 | 0.021085475 | 0.011758923 | 0.042070473 | 0.002092447 | 0.001845768 | 1.25022E-05 | 7.45745E-10 | 1.39757E-05 | 0.572515109 |
| 71 | 0.144612787 | 0.02666468  | 0.04537176  | 0.132053269 | 0.020921312 | 0.011757128 | 0.042017486 | 0.00208677  | 0.00184688  | 1.33245E-05 | 7.3387E-10  | 1.37274E-05 | 0.572640877 |
| 72 | 0.144266078 | 0.026578608 | 0.045415705 | 0.132538045 | 0.020760559 | 0.011755264 | 0.041964985 | 0.002081172 | 0.001847963 | 1.4188E-05  | 7.22342E-10 | 1.34868E-05 | 0.572763945 |
| 73 | 0.143923931 | 0.026493811 | 0.045458723 | 0.13301672  | 0.020603099 | 0.011753335 | 0.041912962 | 0.002075652 | 0.001849017 | 1.50942E-05 | 7.11146E-10 | 1.32536E-05 | 0.572884401 |
| 74 | 0.143586232 | 0.026410252 | 0.045500842 | 0.133489444 | 0.020448823 | 0.011751344 | 0.041861409 | 0.002070207 | 0.001850044 | 1.60446E-05 | 7.00269E-10 | 1.30274E-05 | 0.57300233  |
| 75 | 0.143252868 | 0.026327899 | 0.045542091 | 0.133956365 | 0.020297625 | 0.011749294 | 0.041810317 | 0.002064835 | 0.001851043 | 1.70406E-05 | 6.89698E-10 | 1.2808E-05  | 0.573117813 |
| 76 | 0.142923734 | 0.026246719 | 0.045582495 | 0.134417623 | 0.020149406 | 0.011747188 | 0.041759678 | 0.002059535 | 0.001852017 | 1.80838E-05 | 6.79419E-10 | 1.25951E-05 | 0.573230926 |
| 77 | 0.142598725 | 0.026166681 | 0.04562208  | 0.134873355 | 0.020004068 | 0.011745028 | 0.041709484 | 0.002054305 | 0.001852966 | 1.91757E-05 | 6.69421E-10 | 1.23884E-05 | 0.573341743 |
| 78 | 0.142277743 | 0.026087756 | 0.04566087  | 0.135323691 | 0.019861522 | 0.011742817 | 0.041659728 | 0.002049143 | 0.00185389  | 2.0318E-05  | 6.59693E-10 | 1.21875E-05 | 0.573450335 |
| 79 | 0.141960692 | 0.026009914 | 0.045698888 | 0.135768757 | 0.019721679 | 0.011740557 | 0.041610402 | 0.002044047 | 0.00185479  | 2.15121E-05 | 6.50225E-10 | 1.19924E-05 | 0.573556769 |
| 80 | 0.141647479 | 0.02593313  | 0.045736156 | 0.136208675 | 0.019584455 | 0.011738251 | 0.041561498 | 0.002039016 | 0.001855668 | 2.27599E-05 | 6.41006E-10 | 1.18028E-05 | 0.573661109 |
| 81 | 0.141338015 | 0.025857375 | 0.045772696 | 0.136643562 | 0.019449771 | 0.0117359   | 0.041513011 | 0.002034048 | 0.001856524 | 2.40629E-05 | 6.32026E-10 | 1.16184E-05 | 0.573763417 |
| 82 | 0.141032213 | 0.025782624 | 0.045808528 | 0.137073532 | 0.01931755  | 0.011733507 | 0.041464932 | 0.002029141 | 0.001857358 | 2.54228E-05 | 6.23278E-10 | 1.1439E-05  | 0.573863752 |
| 83 | 0.140729991 | 0.025708854 | 0.045843673 | 0.137498694 | 0.019187717 | 0.011731073 | 0.041417255 | 0.002024295 | 0.001858171 | 2.68415E-05 | 6.14752E-10 | 1.12645E-05 | 0.57396217  |
| 84 | 0.140431268 | 0.025636039 | 0.045878148 | 0.137919153 | 0.019060204 | 0.011728602 | 0.041369973 | 0.002019508 | 0.001858964 | 2.83206E-05 | 6.0644E-10  | 1.10946E-05 | 0.574058727 |
| 85 | 0.140135966 | 0.025564157 | 0.045911972 | 0.138335013 | 0.018934941 | 0.011726093 | 0.041323079 | 0.002014778 | 0.001859737 | 2.98619E-05 | 5.98334E-10 | 1.09292E-05 | 0.574153473 |
| 86 | 0.139844009 | 0.025493186 | 0.045945163 | 0.13874637  | 0.018811864 | 0.011723549 | 0.041276568 | 0.002010104 | 0.001860492 | 3.14674E-05 | 5.90427E-10 | 1.07681E-05 | 0.57424646  |
| 87 | 0.139555325 | 0.025423105 | 0.045977737 | 0.139153322 | 0.01869091  | 0.011720972 | 0.041230432 | 0.002005485 | 0.001861227 | 3.31387E-05 | 5.82711E-10 | 1.06112E-05 | 0.574337734 |
| 88 | 0.139269842 | 0.025353893 | 0.04600971  | 0.139555596 | 0.018572021 | 0.011718362 | 0.041184667 | 0.00200092  | 0.001861945 | 3.48779E-05 | 5.75181E-10 | 1.04583E-05 | 0.574427343 |
| 89 | 0.138987493 | 0.025285529 | 0.046041099 | 0.139954374 | 0.018455137 | 0.011715722 | 0.041139265 | 0.001996407 | 0.001862646 | 3.66869E-05 | 5.67829E-10 | 1.03092E-05 | 0.57451533  |
| 90 | 0.138708212 | 0.025217996 | 0.046071917 | 0.140348651 | 0.018340205 | 0.011713053 | 0.041094221 | 0.001991946 | 0.001863329 | 3.85675E-05 | 5.60649E-10 | 1.01639E-05 | 0.574601738 |
| 91 | 0.138431933 | 0.025151273 | 0.046102181 | 0.140738874 | 0.01822717  | 0.011710356 | 0.041049529 | 0.001987535 | 0.001863996 | 4.05217E-05 | 5.53636E-10 | 1.00221E-05 | 0.574686609 |
| 92 | 0.138158596 | 0.025085343 | 0.046131903 | 0.141125124 | 0.018115981 | 0.011707633 | 0.041005185 | 0.001983173 | 0.001864646 | 4.25517E-05 | 5.46784E-10 | 9.8838E-06  | 0.57476998  |
| 93 | 0.137888138 | 0.025020189 | 0.046161097 | 0.14150748  | 0.01800659  | 0.011704884 | 0.040961181 | 0.001978859 | 0.001865281 | 4.46594E-05 | 5.40088E-10 | 9.74883E-06 | 0.574851892 |
| 94 | 0.137620503 | 0.024955794 | 0.046189776 | 0.141886019 | 0.017898948 | 0.011702111 | 0.040917513 | 0.001974592 | 0.001865901 | 4.68468E-05 | 5.33542E-10 | 9.61709E-06 | 0.574932379 |
| 95 | 0.137355633 | 0.02489214  | 0.046217952 | 0.142260815 | 0.01779301  | 0.011699314 | 0.040874176 | 0.001970372 | 0.001866506 | 4.91162E-05 | 5.27141E-10 | 9.48846E-06 | 0.575011477 |
| 96 | 0.137093472 | 0.024829213 | 0.046245639 | 0.142631939 | 0.017688731 | 0.011696496 | 0.040831165 | 0.001966196 | 0.001867096 | 5.14696E-05 | 5.20881E-10 | 9.36283E-06 | 0.57508922  |
| 97 | 0.136833968 | 0.024766997 | 0.046272846 | 0.142999461 | 0.01758607  | 0.011693656 | 0.040788474 | 0.001962065 | 0.001867672 | 5.39092E-05 | 5.14758E-10 | 9.24012E-06 | 0.57516564  |

|     |             |             |             |             |             |             |             |             |             |             |             |             |             |
|-----|-------------|-------------|-------------|-------------|-------------|-------------|-------------|-------------|-------------|-------------|-------------|-------------|-------------|
| 98  | 0.136577068 | 0.024705477 | 0.046299586 | 0.143363449 | 0.017484985 | 0.011690797 | 0.040746098 | 0.001957977 | 0.001868235 | 5.64371E-05 | 5.08766E-10 | 9.12022E-06 | 0.57524077  |
| 99  | 0.136322721 | 0.024644639 | 0.04632587  | 0.143723968 | 0.017385436 | 0.011687917 | 0.040704034 | 0.001953932 | 0.001868784 | 5.90557E-05 | 5.02903E-10 | 9.00304E-06 | 0.575314639 |
| 100 | 0.13607088  | 0.024584468 | 0.046351708 | 0.144081083 | 0.017287386 | 0.01168502  | 0.040662275 | 0.001949928 | 0.00186932  | 6.17672E-05 | 4.97163E-10 | 8.88849E-06 | 0.575387276 |
| 101 | 0.135821495 | 0.024524951 | 0.04637711  | 0.144434855 | 0.017190797 | 0.011682105 | 0.040620818 | 0.001945965 | 0.001869843 | 6.45739E-05 | 4.91544E-10 | 8.77649E-06 | 0.57545871  |
| 102 | 0.13557452  | 0.024466075 | 0.046402086 | 0.144785344 | 0.017095634 | 0.011679173 | 0.040579657 | 0.001942043 | 0.001870354 | 6.7478E-05  | 4.8604E-10  | 8.66696E-06 | 0.575528969 |
| 103 | 0.13532991  | 0.024407827 | 0.046426645 | 0.145132609 | 0.017001862 | 0.011676225 | 0.040538789 | 0.001938159 | 0.001870853 | 7.0482E-05  | 4.8065E-10  | 8.55982E-06 | 0.575598077 |
| 104 | 0.135087622 | 0.024350194 | 0.046450798 | 0.145476707 | 0.016909449 | 0.011673262 | 0.040498209 | 0.001934314 | 0.00187134  | 7.35883E-05 | 4.7537E-10  | 8.45499E-06 | 0.575666062 |
| 105 | 0.134847611 | 0.024293165 | 0.046474552 | 0.145817693 | 0.016818361 | 0.011670284 | 0.040457913 | 0.001930507 | 0.001871815 | 7.67992E-05 | 4.70196E-10 | 8.35241E-06 | 0.575732946 |
| 106 | 0.134609838 | 0.024236727 | 0.046497916 | 0.146155621 | 0.016728567 | 0.011667292 | 0.040417897 | 0.001926737 | 0.001872279 | 8.01173E-05 | 4.65125E-10 | 8.252E-06   | 0.575798755 |
| 107 | 0.13437426  | 0.024180869 | 0.0465209   | 0.146490544 | 0.016640039 | 0.011664287 | 0.040378156 | 0.001923003 | 0.001872732 | 8.35449E-05 | 4.60154E-10 | 8.15371E-06 | 0.57586351  |
| 108 | 0.13414084  | 0.02412558  | 0.04654351  | 0.146822511 | 0.016552745 | 0.01166127  | 0.040338687 | 0.001919305 | 0.001873175 | 8.70847E-05 | 4.5528E-10  | 8.05746E-06 | 0.575927235 |
| 109 | 0.133909537 | 0.024070849 | 0.046565755 | 0.147151574 | 0.016466659 | 0.01165824  | 0.040299486 | 0.001915642 | 0.001873607 | 9.07392E-05 | 4.50502E-10 | 7.9632E-06  | 0.575989949 |
| 110 | 0.133680315 | 0.024016667 | 0.046587642 | 0.14747778  | 0.016381752 | 0.011655198 | 0.040260548 | 0.001912014 | 0.001874028 | 9.45108E-05 | 4.45815E-10 | 7.87086E-06 | 0.576051675 |
| 111 | 0.133453137 | 0.023963021 | 0.046609179 | 0.147801176 | 0.016297998 | 0.011652146 | 0.04022187  | 0.001908419 | 0.001874439 | 9.84024E-05 | 4.41217E-10 | 7.7804E-06  | 0.576112431 |
| 112 | 0.133227967 | 0.023909903 | 0.046630373 | 0.148121808 | 0.016215372 | 0.011649083 | 0.040183449 | 0.001904858 | 0.001874841 | 0.000102416 | 4.36706E-10 | 7.69175E-06 | 0.576172238 |
| 113 | 0.133004771 | 0.023857302 | 0.04665123  | 0.148439721 | 0.016133849 | 0.01164601  | 0.04014528  | 0.001901329 | 0.001875233 | 0.000106556 | 4.3228E-10  | 7.60487E-06 | 0.576231114 |
| 114 | 0.132783514 | 0.02380521  | 0.046671758 | 0.148754958 | 0.016053404 | 0.011642927 | 0.04010736  | 0.001897832 | 0.001875616 | 0.000110823 | 4.27936E-10 | 7.5197E-06  | 0.576289076 |
| 115 | 0.132564165 | 0.023753617 | 0.046691963 | 0.149067562 | 0.015974015 | 0.011639835 | 0.040069686 | 0.001894367 | 0.001875989 | 0.000115221 | 4.23672E-10 | 7.4362E-06  | 0.576346144 |
| 116 | 0.13234669  | 0.023702515 | 0.046711852 | 0.149377574 | 0.015895657 | 0.011636735 | 0.040032253 | 0.001890933 | 0.001876353 | 0.000119752 | 4.19486E-10 | 7.35432E-06 | 0.576402333 |
| 117 | 0.132131057 | 0.023651893 | 0.04673143  | 0.149685033 | 0.01581831  | 0.011633626 | 0.03999506  | 0.001887529 | 0.001876709 | 0.000124419 | 4.15375E-10 | 7.27402E-06 | 0.576457659 |
| 118 | 0.131917237 | 0.023601745 | 0.046750703 | 0.149989981 | 0.015741952 | 0.011630509 | 0.039958102 | 0.001884155 | 0.001877055 | 0.000129226 | 4.11338E-10 | 7.19525E-06 | 0.57651214  |
| 119 | 0.131705199 | 0.02355206  | 0.046769678 | 0.150292454 | 0.015666563 | 0.011627385 | 0.039921376 | 0.00188081  | 0.001877394 | 0.000134174 | 4.07373E-10 | 7.11797E-06 | 0.57656579  |
| 120 | 0.131494914 | 0.023502833 | 0.04678836  | 0.15059249  | 0.015592121 | 0.011624253 | 0.039884878 | 0.001877494 | 0.001877724 | 0.000139267 | 4.03478E-10 | 7.04213E-06 | 0.576618623 |
| 121 | 0.131286353 | 0.023454054 | 0.046806754 | 0.150890126 | 0.015518608 | 0.011621115 | 0.039848607 | 0.001874206 | 0.001878046 | 0.000144508 | 3.99652E-10 | 6.96771E-06 | 0.576670656 |
| 122 | 0.131079488 | 0.023405716 | 0.046824866 | 0.151185397 | 0.015446004 | 0.01161797  | 0.039812558 | 0.001870947 | 0.00187836  | 0.0001499   | 3.95891E-10 | 6.89467E-06 | 0.5767219   |
| 123 | 0.126758574 | 0.023465584 | 0.048332361 | 0.135897296 | 0.013132929 | 0.00988624  | 0.043616402 | 0.006016152 | 0.008380785 | 0.013658738 | 2.81416E-10 | 8.69762E-06 | 0.57084624  |
| 124 | 0.126497054 | 0.023405984 | 0.048325477 | 0.136089036 | 0.013065808 | 0.009878582 | 0.043554879 | 0.006002655 | 0.008375937 | 0.014057369 | 2.78669E-10 | 8.60352E-06 | 0.570738615 |
| 125 | 0.126236467 | 0.023346698 | 0.048317983 | 0.136277585 | 0.012999392 | 0.009870856 | 0.043493346 | 0.005989215 | 0.008371009 | 0.014460361 | 2.75966E-10 | 8.51108E-06 | 0.570628577 |
